# Supplementary material
Source: PubMed Central journal article supplement (PMC3290039)

Figure S1

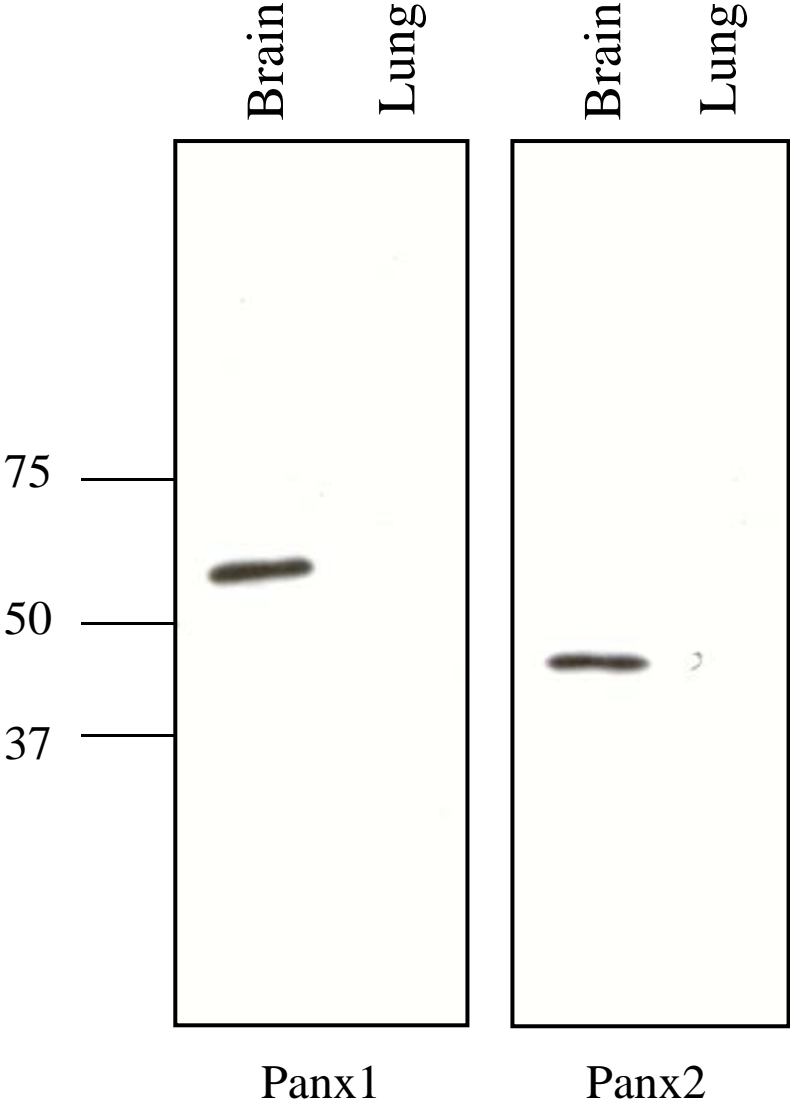

Figure S2

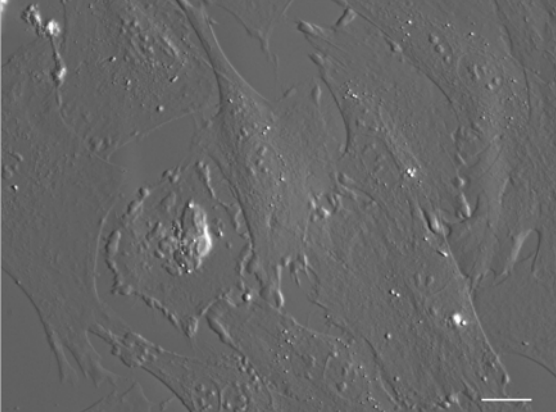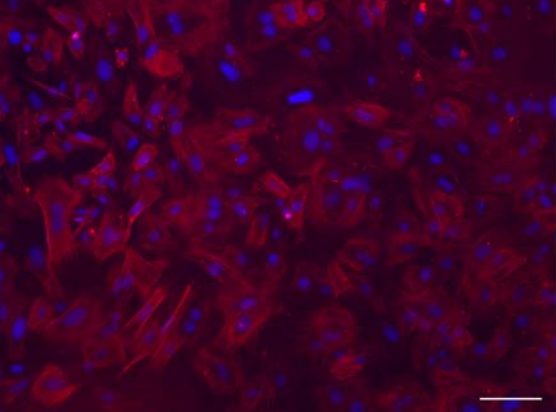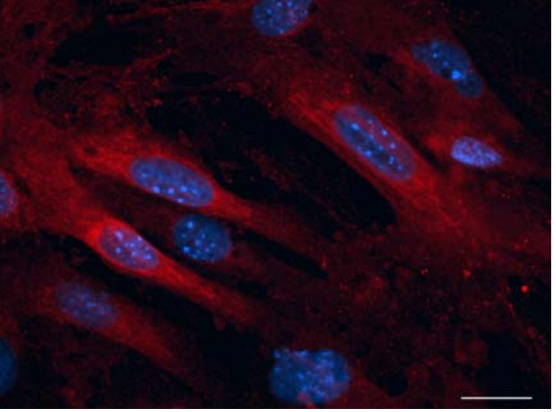

Figure S3

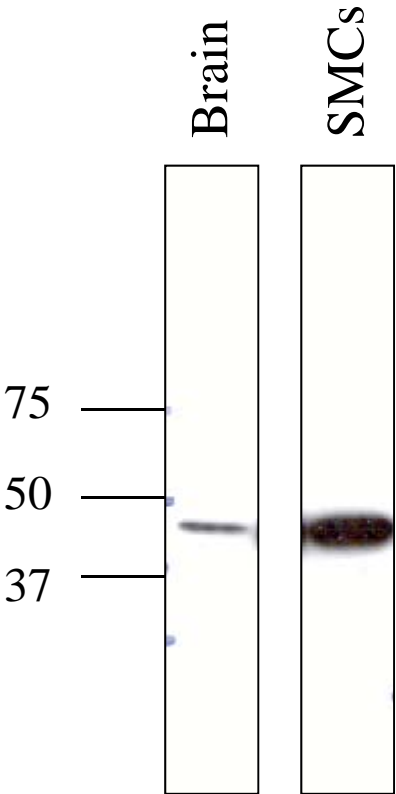

Supplement: jvr-0049-0101-s01.pdf [file jvr-0049-0101-s01.pdf]
